# Supplementary material for: Schwann cell-matrix coated PCL-MWCNT multifunctional nanofibrous scaffolds for neural regeneration
Source: Royal Society of Chemistry journal article supplement (doi:10.1039/d2ra05368c), 2023-01-01
Supplement: d2ra05368c1.pdf [file d2ra05368c1.pdf]

## Schwann cell-matrix coated PCL-MWCNT multifunctional nanofibrous scaffolds for neural regeneration

Yas Al-Hadeethi <sup>a †</sup>, Aishwarya Nagarajan <sup>b †</sup>, Srividya Hanuman <sup>b</sup>, Hiba Mohammed <sup>c</sup>, Aakanksha M. Vetekar <sup>b, d</sup>, Goutam Thakur <sup>d</sup>, Le N. M. Dinh <sup>e</sup>, Yin Yao <sup>e</sup>, Mkawi, E. M <sup>a</sup>, Mahmoud Ali Hussein <sup>f, g</sup>, Vipul Agarwal <sup>e \*</sup>, Manasa Nune <sup>b \*</sup>

<sup>a</sup> Department of Physics, Faculty of Science, King Abdelaziz University, Jeddah 21589, Kingdom of Saudi Arabia

<sup>b</sup> Manipal Institute of Regenerative Medicine, Bengaluru, Manipal Academy of Higher Education, Manipal 576104, Karnataka, India

<sup>c</sup> Fondazione Novara Sviluppo, 28100, Novara, Italy

<sup>d</sup> Department of Biomedical Engineering, Manipal Institute of Technology, Manipal Academy of Higher Education, Manipal 576104, Karnataka, India

<sup>e</sup> Cluster for Advanced Macromolecular Design (CAMD), School of Chemical Engineering, University of New South Wales, Sydney, NSW 2052, Australia

<sup>f</sup> Department of Chemistry, Faculty of Science, King Abdelaziz University, Jeddah 21589, Saudi Arabia

<sup>g</sup> Department of Chemistry, Faculty of Science, Assiut University, Assiut 71516, Egypt

<sup>†</sup> These authors contributed to the work equally

\*Corresponding authors: agarwalvipul84@gmail.com, manasa.nune@manipal.edu

### Supporting Information

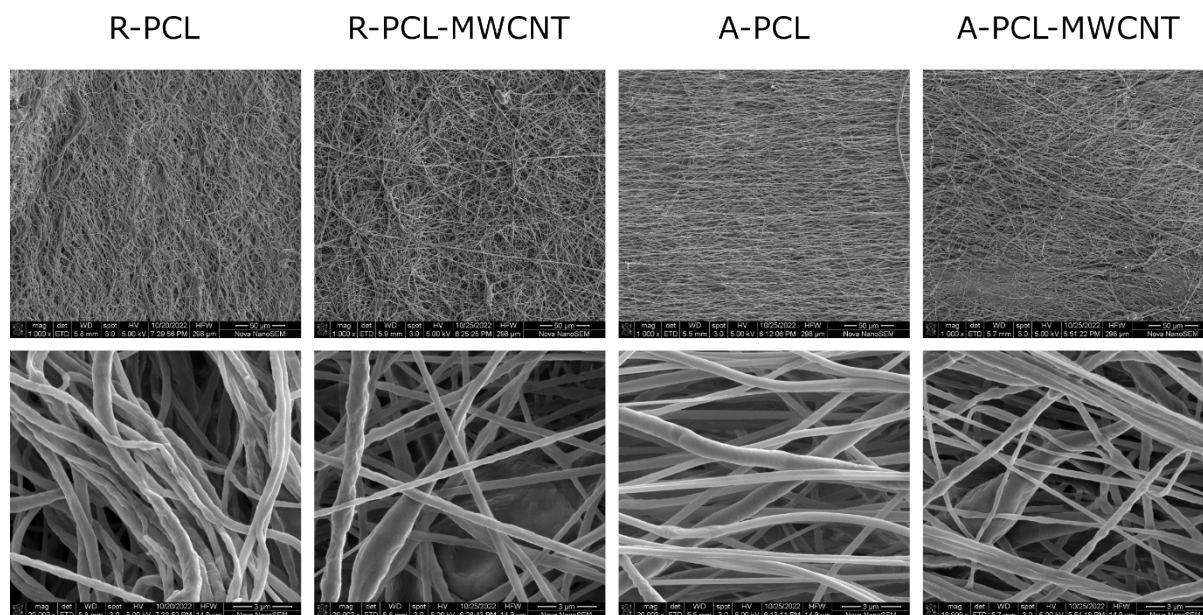

**Figure S1.** SEM images of different scaffolds with different morphologies (random and aligned) with and without MWCNT. Scale bars – first row (50 μm) and second row (3 μm).

## Supporting Information

**Table S1.** Static water contact angle measured on different scaffolds with different morphologies (random and aligned) with and without MWCNT and ACM coating. Data is presented as average  $\pm$  standard deviation (n=3).

| <b>Samples</b>  | <b>Left angle (°)</b> | <b>Right angle (°)</b> |
|-----------------|-----------------------|------------------------|
| R-PCL           | 130.8 $\pm$ 3.7       | 132.4 $\pm$ 3.2        |
| R-PCL-MWCNT     | 137.3 $\pm$ 3.2       | 135.7 $\pm$ 4.1        |
| R-PCL+ ACM      | 42.0 $\pm$ 3.2        | 41.6 $\pm$ 1.06        |
| R-PCL-MWCNT+ACM | 53.9 $\pm$ 1.7        | 54 $\pm$ 2.2           |
| A-PCL           | 132.7 $\pm$ 0.4       | 132.2 $\pm$ 1.6        |
| A-PCL-MWCNT     | 129.6 $\pm$ 2.1       | 129.2 $\pm$ 3.3        |
| A-PCL+ACM       | 39.4 $\pm$ 2.4        | 37.2 $\pm$ 2.8         |
| A-PCL-MWCNT+ACM | 50.1 $\pm$ 0.6        | 53.6 $\pm$ 1.2         |

**Table S2.** Mechanical data in tensile strength and elongation at break of different scaffolds with different morphologies (random and aligned) with and without MWCNT. Data is presented as average  $\pm$  standard deviation (n=3).

| <b>Samples</b> | <b>Tensile strength (MPa)</b> | <b>Elongation at break (%)</b> |
|----------------|-------------------------------|--------------------------------|
| R-PCL          | 3.31 $\pm$ 1.75               | 131.05 $\pm$ 21.66             |
| R-PCL-MWCNT    | 6.10 $\pm$ 1.70               | 145.37 $\pm$ 33.62             |
| A-PCL          | 15.73 $\pm$ 5.74              | 46.74 $\pm$ 3.38               |
| A-PCL-MWCNT    | 5.20 $\pm$ 2.40               | 72.44 $\pm$ 13.39              |

Supporting Information

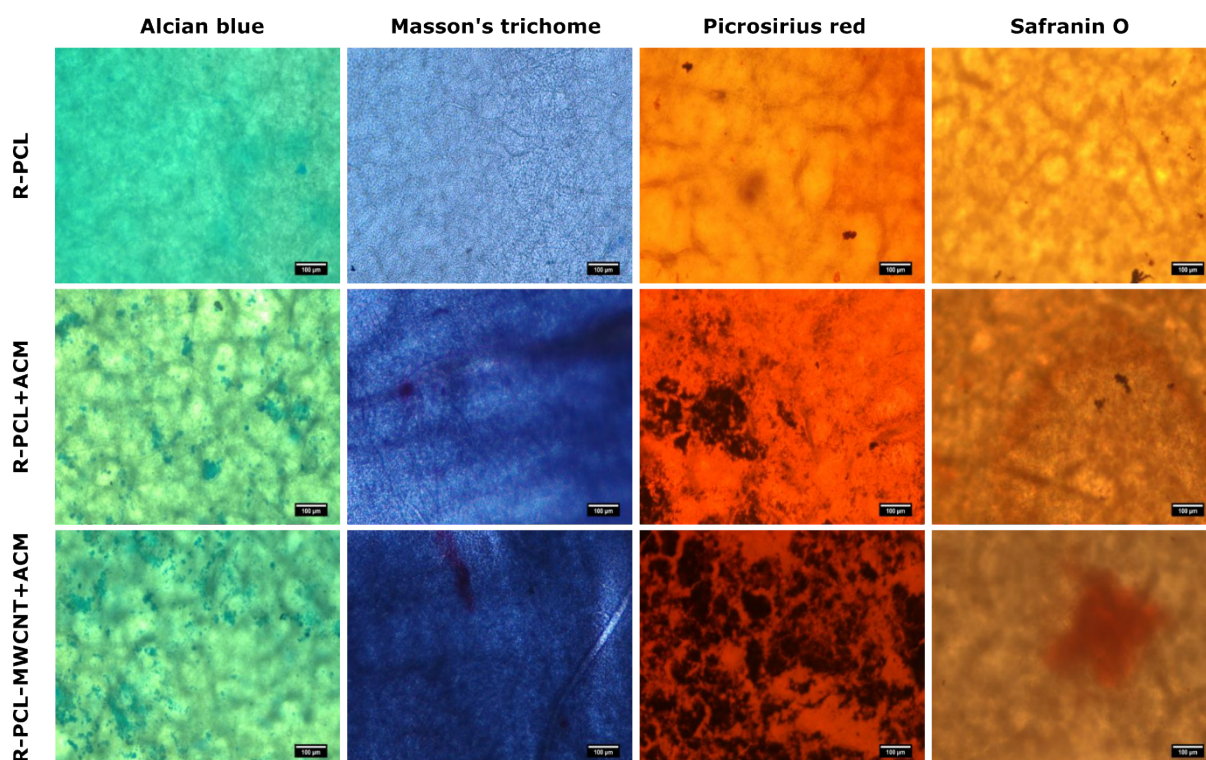

**Figure S2.** Cytochemical staining of different scaffolds with and without MWCNT and ACM coating showing different components of ACM.
